# Supplementary material
Source: Royal Society of Chemistry journal article supplement (doi:10.1039/d6cp01369d)
Supplement: d6cp01369d1.pdf [file d6cp01369d1.pdf]

## Supporting Information

### Origin of Hydrogen Evolution Activity of Single-Atom Metals Anchored on Stone- Wales Defective Graphene: A First-Principles Study

Rui Sun, Zhongxu Wang\*, Lei Chen\*, Jingxiang Zhao

College of Chemistry and Chemical Engineering, and Key Laboratory of Photonic and  
Electronic Bandgap Materials, Ministry of Education, Harbin Normal University,  
Harbin 150025, China

*\*To whom correspondence should be addressed. Email: wzx\_azsecho@163.com (Z.*

*Wang)*

**Table S1.** The computed binding energies (eV) of TMs adsorbed at three typical sites

on the SW-G monolayer, and the Bader charge transfer (e) at the most stable site (red value) are also presented.

| TM | Five membered rings | Seven membered rings | Bridge site | Charge transfer |
|----|---------------------|----------------------|-------------|-----------------|
| Ti | -5.31               | -5.10                | -5.26       | -1.14           |
| V  | -2.64               | -2.24                | -2.59       | -0.99           |
| Cr | -1.50               | -1.19                | -0.39       | -0.87           |
| Mn | -0.09               | 0.26                 | -0.05       | -0.68           |
| Fe | -1.66               | -1.61                | -1.62       | -0.61           |
| Co | -2.23               | -1.91                | -2.18       | -0.58           |
| Ni | -2.47               | -2.34                | -2.23       | -0.52           |
| Cu | -1.19               | -1.21                | -1.21       | -0.20           |
| Zr | -3.53               | -3.24                | -4.01       | -1.10           |
| Nb | -3.24               | -2.71                | -3.47       | -1.06           |
| Mo | -1.97               | -1.41                | -1.85       | -0.82           |
| Ru | -2.83               | -2.38                | -2.75       | -0.44           |
| Rh | -2.99               | -2.62                | -2.77       | -0.29           |
| Pd | -1.27               | -0.60                | -1.47       | -0.27           |
| Ag | 0.97                | 0.58                 | 0.58        | -0.20           |
| Hf | -3.68               | -3.14                | -3.57       | -1.07           |
| Ta | -3.67               | -3.12                | -3.41       | -0.89           |
| W  | -2.74               | -1.90                | -2.51       | -0.74           |
| Os | -2.34               | -1.85                | -1.96       | -0.38           |
| Ir | -2.43               | -2.07                | -1.47       | -0.14           |
| Pt | -2.86               | -1.64                | -2.95       | -0.02           |
| Au | 0.25                | -0.08                | -1.21       | 0.12            |

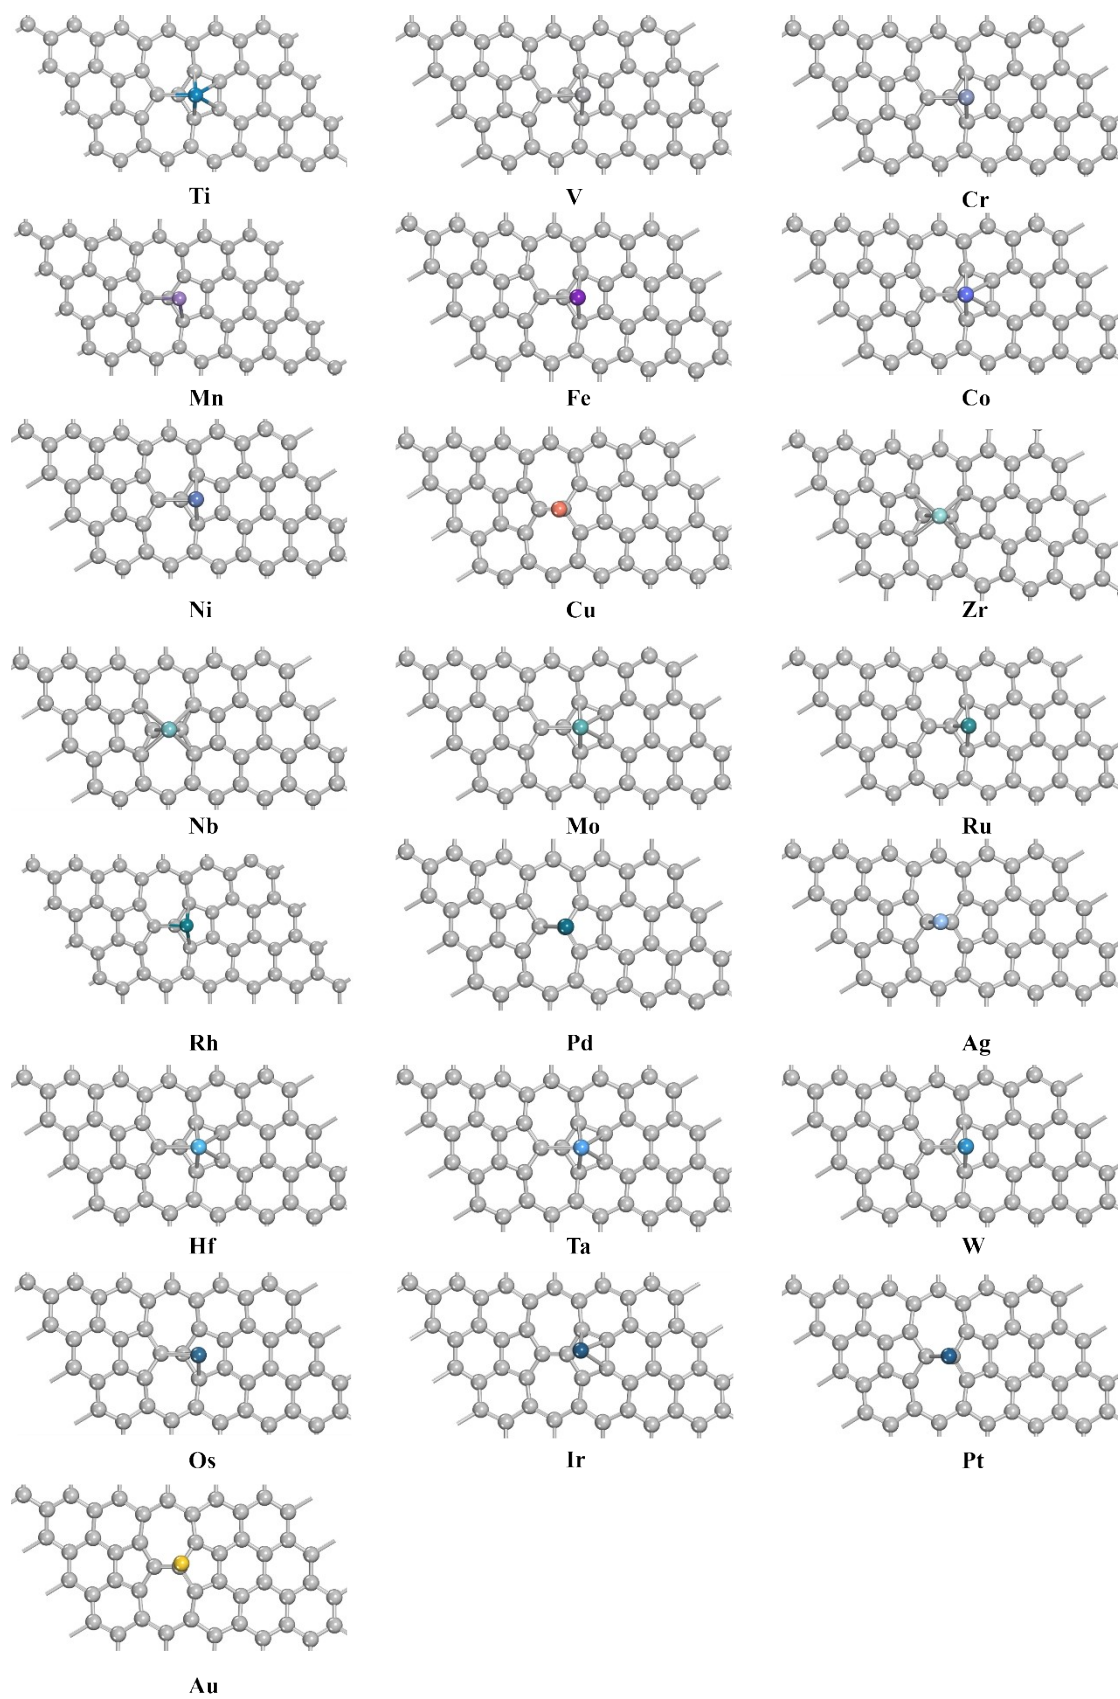

**Fig. S1.** Optimized geometrical structures of TM@SW-G systems.

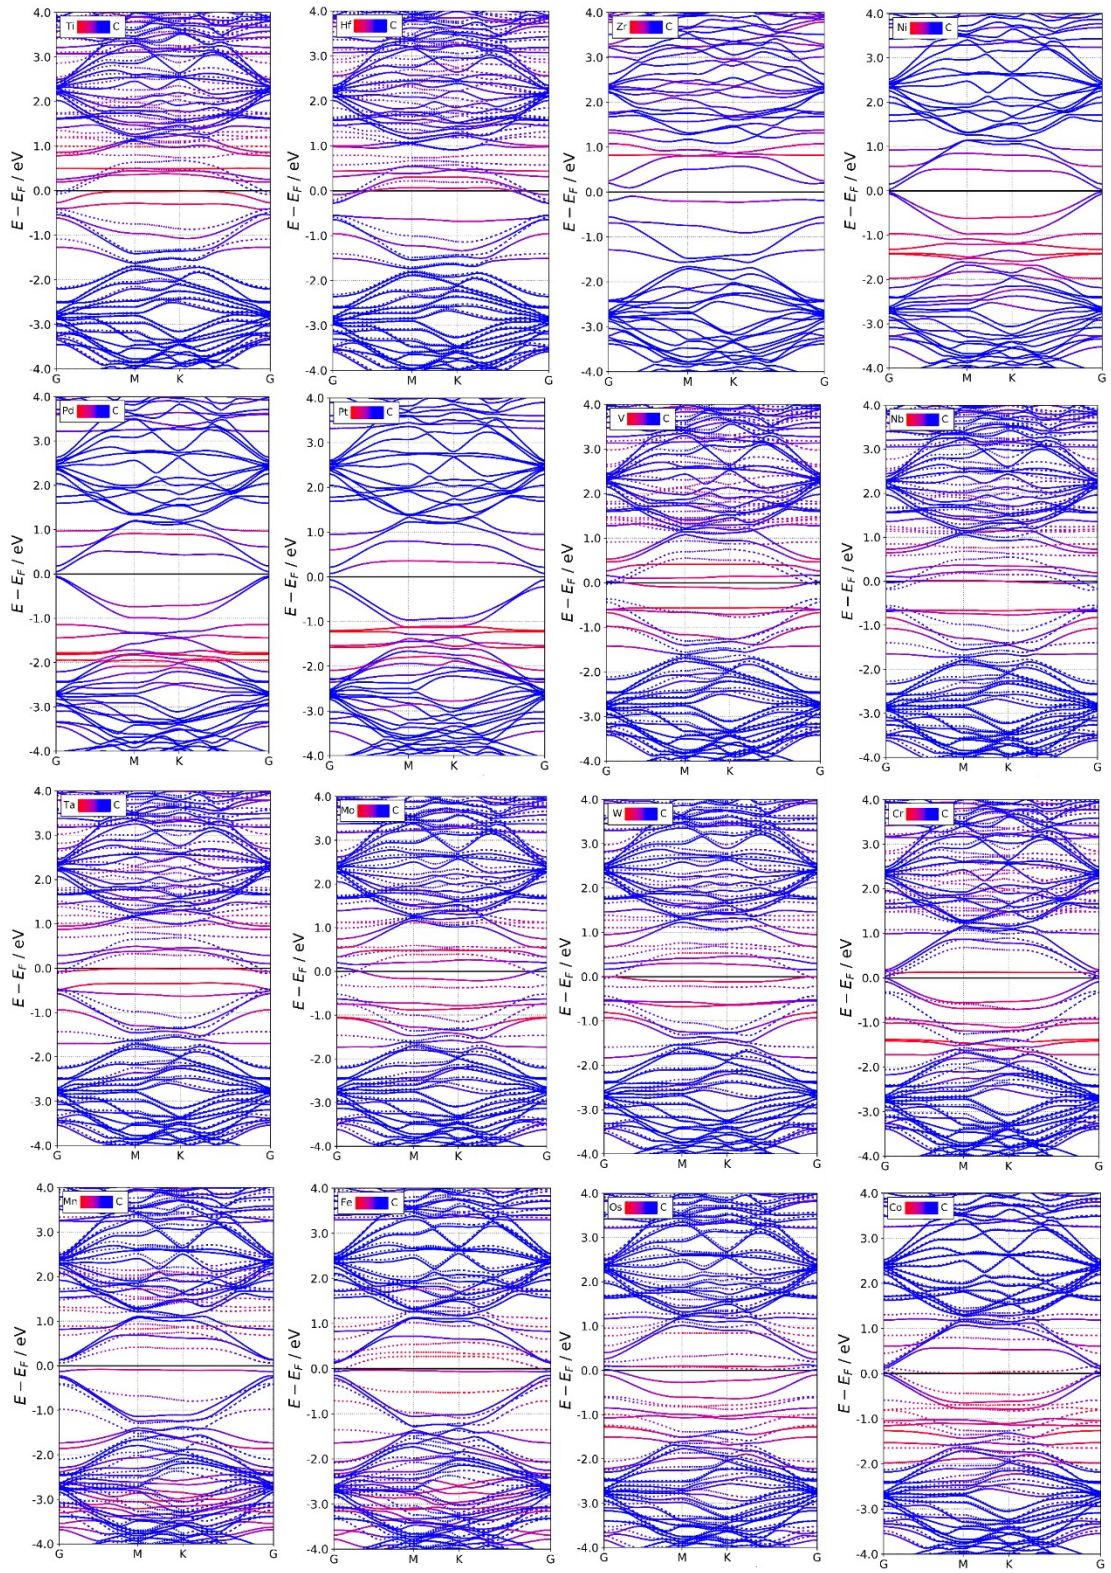

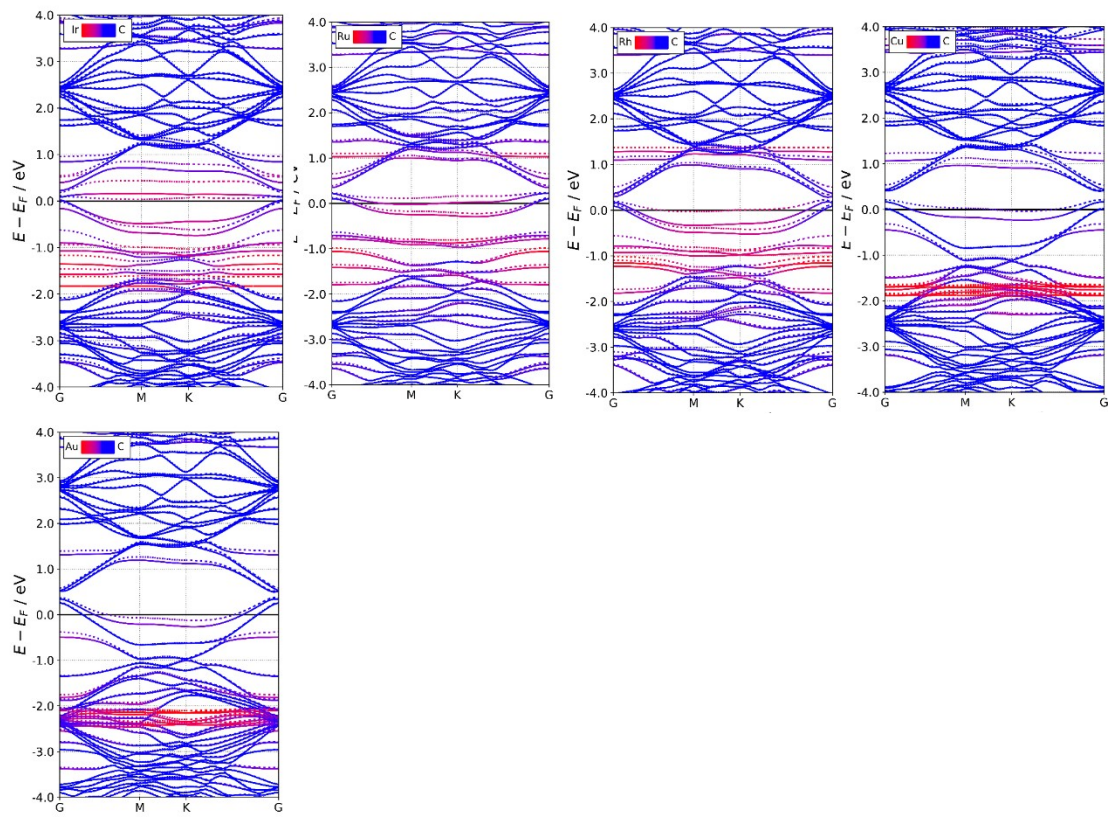

**Fig. S2.** The computed band structure of TM@SW-G systems.

**Table S2.** Calculated hydrogen adsorption Gibbs free energies ( $\Delta G_{H^*}$ ) of all investigated SACs with and without implicit solvent effect.

| TM | with explicit solvent |                  | without solvent  |                  |
|----|-----------------------|------------------|------------------|------------------|
|    | $\Delta E_{H^*}$      | $\Delta G_{H^*}$ | $\Delta E_{H^*}$ | $\Delta G_{H^*}$ |
| Ti | -0.51                 | -0.27            | -0.50            | -0.26            |
| V  | -0.33                 | -0.09            | -0.23            | 0.01             |
| Cr | 0.48                  | 0.72             | 0.60             | 0.84             |
| Mn | -0.28                 | -0.04            | -0.18            | 0.06             |
| Fe | 2.11                  | 2.35             | 2.06             | 2.30             |
| Co | 0.33                  | 0.57             | 0.50             | 0.74             |
| Ni | -0.35                 | -0.11            | -0.43            | -0.19            |
| Cu | 0.61                  | 0.85             | 0.56             | 0.80             |
| Zr | -0.37                 | -0.13            | -0.39            | -0.15            |
| Nb | -0.91                 | -0.67            | -0.83            | -0.59            |
| Mo | -0.74                 | -0.50            | -0.80            | -0.56            |
| Ru | -0.71                 | -0.47            | -0.69            | -0.45            |
| Rh | -0.39                 | -0.15            | -0.43            | -0.19            |
| Pd | 0.51                  | 0.75             | 0.48             | 0.72             |
| Hf | -0.77                 | -0.53            | -0.90            | -0.66            |
| Ta | -1.24                 | -1.00            | -1.08            | -0.84            |
| W  | -0.67                 | -0.43            | -0.74            | -0.50            |
| Os | -1.41                 | -1.17            | -1.36            | -1.12            |
| Ir | 0.41                  | 0.65             | 0.40             | 0.64             |
| Pt | 1.66                  | 1.90             | 1.43             | 1.67             |
| Au | 0.61                  | 0.85             | 0.50             | 0.74             |

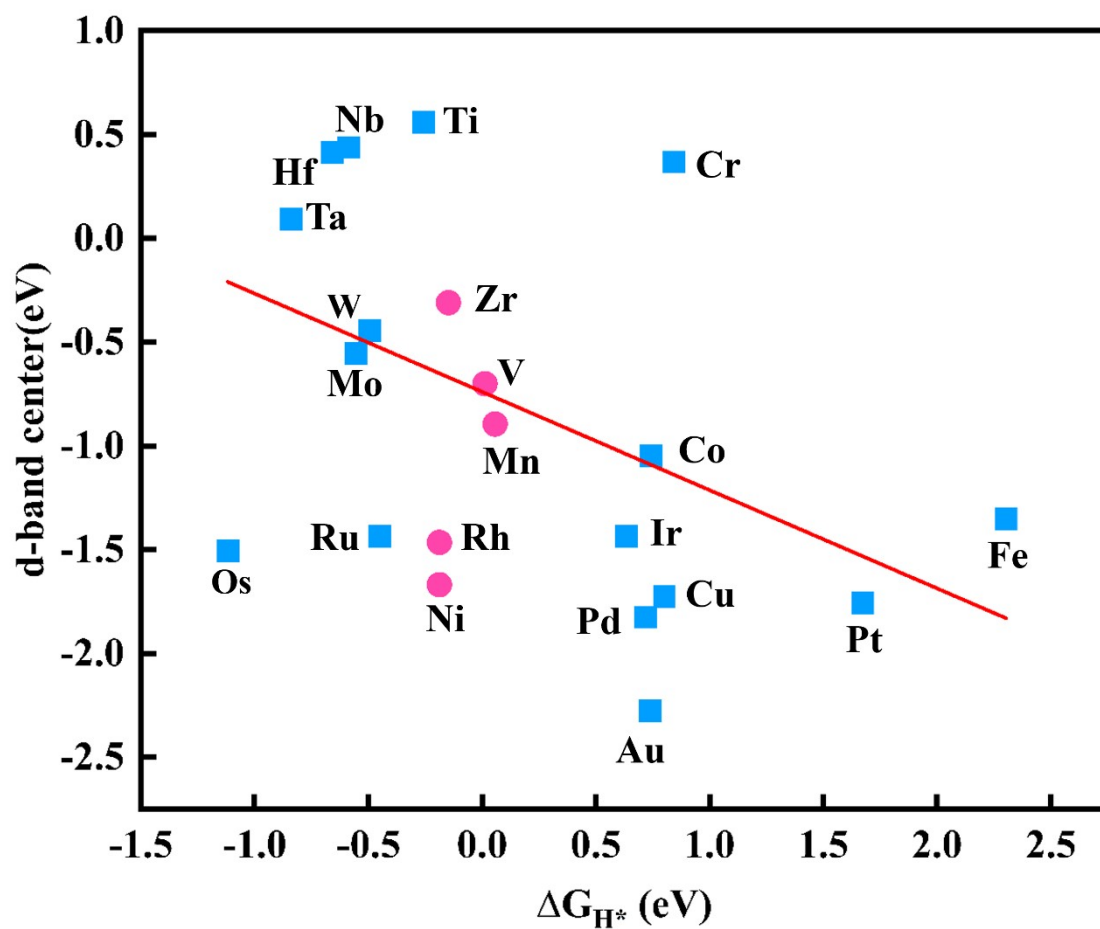

Fig. S3. The correlation between the  $\Delta G_{H^*}$  of hydrogen adsorption and the d-band center.

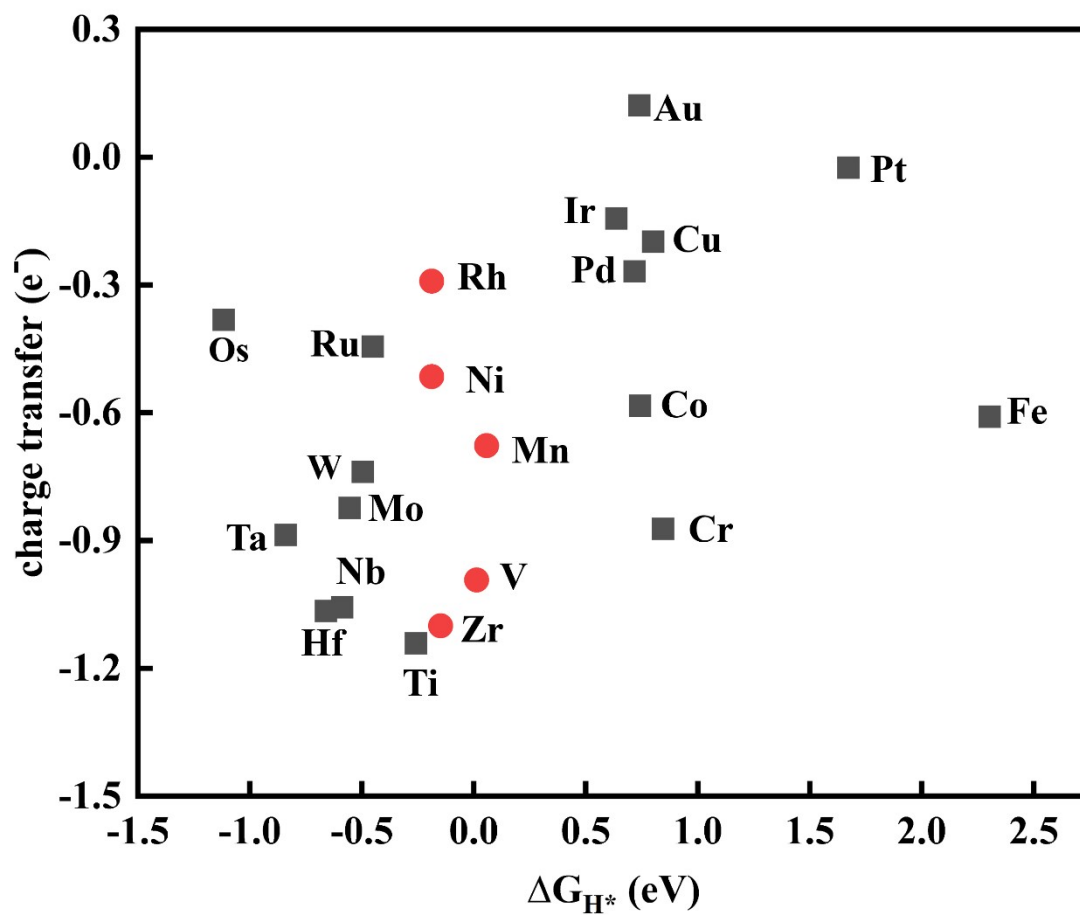

Fig. S4. The correlation between the  $\Delta G_{H^*}$  of hydrogen adsorption and the Bader charge.

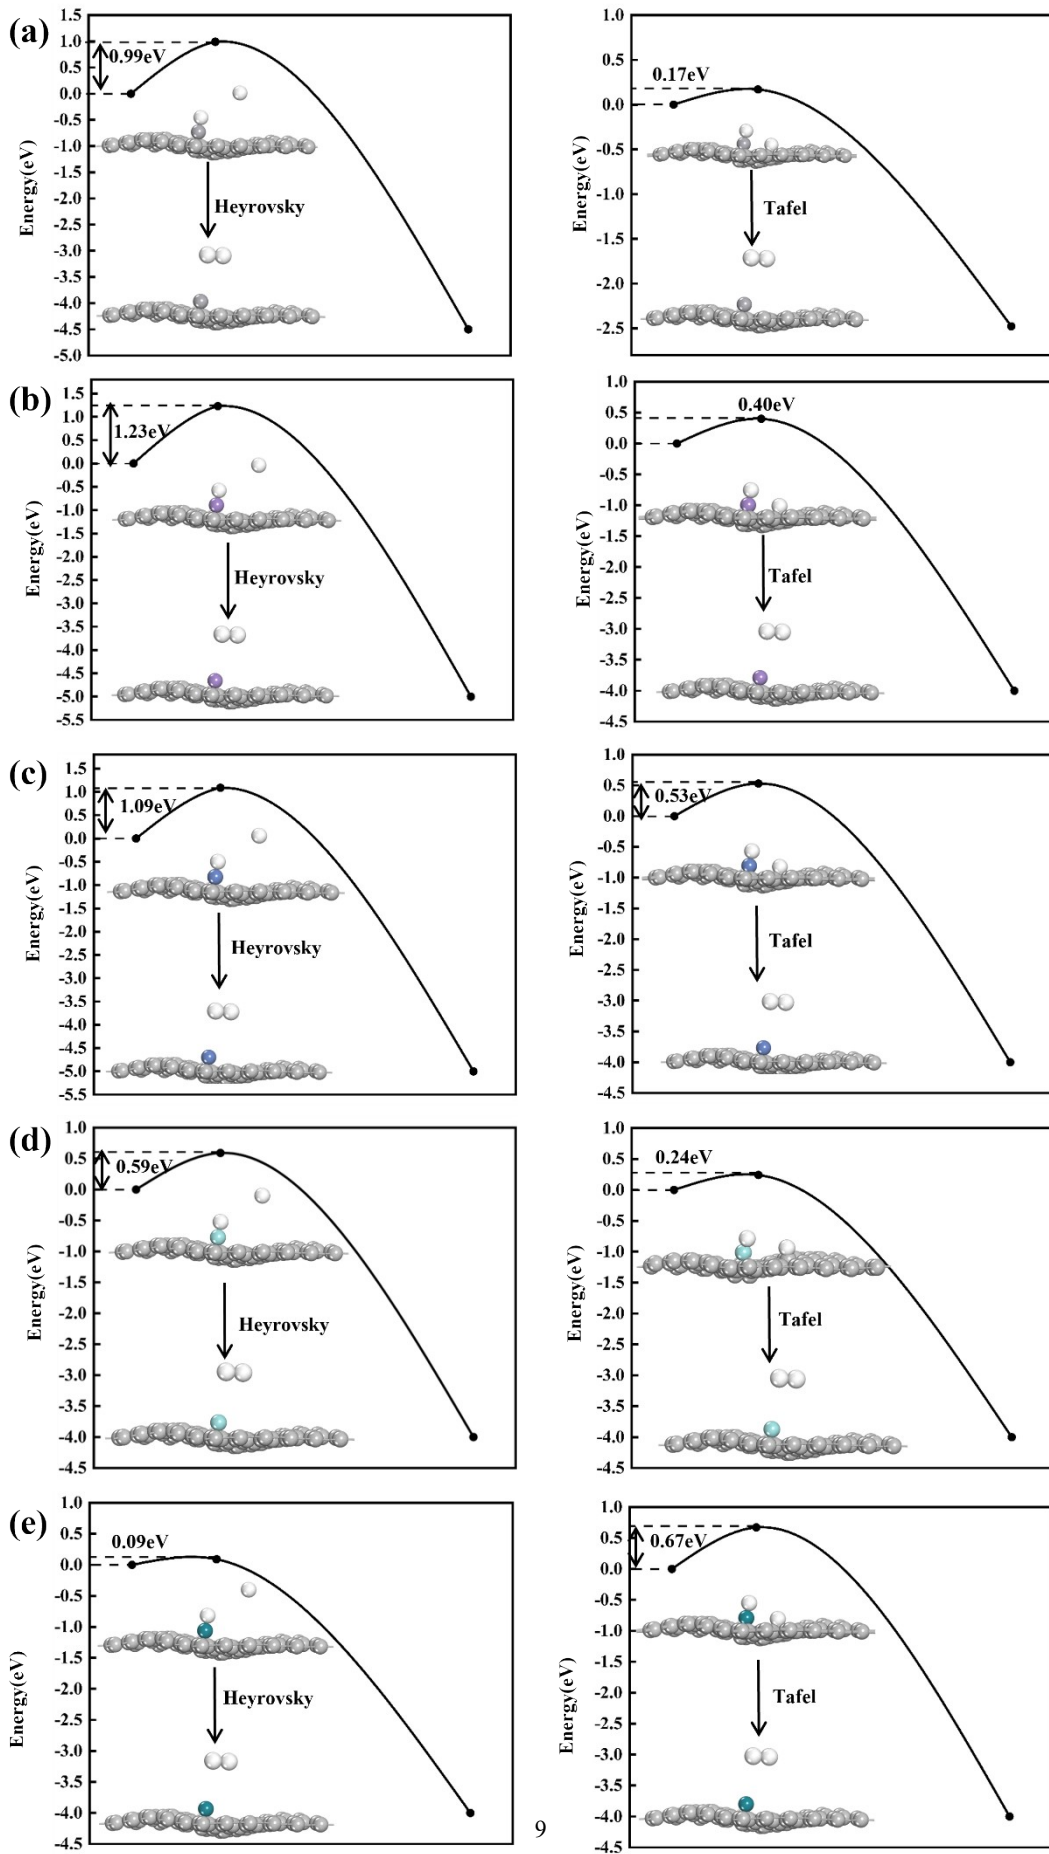

**Fig. S5.** The minimum-energy pathways and the corresponding barriers of the Heyrovsky and Tafel reactions on (a) V@SW-G, (b) Mn@SW-G, (c) Ni@SW-G, Zr@SW-G, and (d) Rh@SW-G.

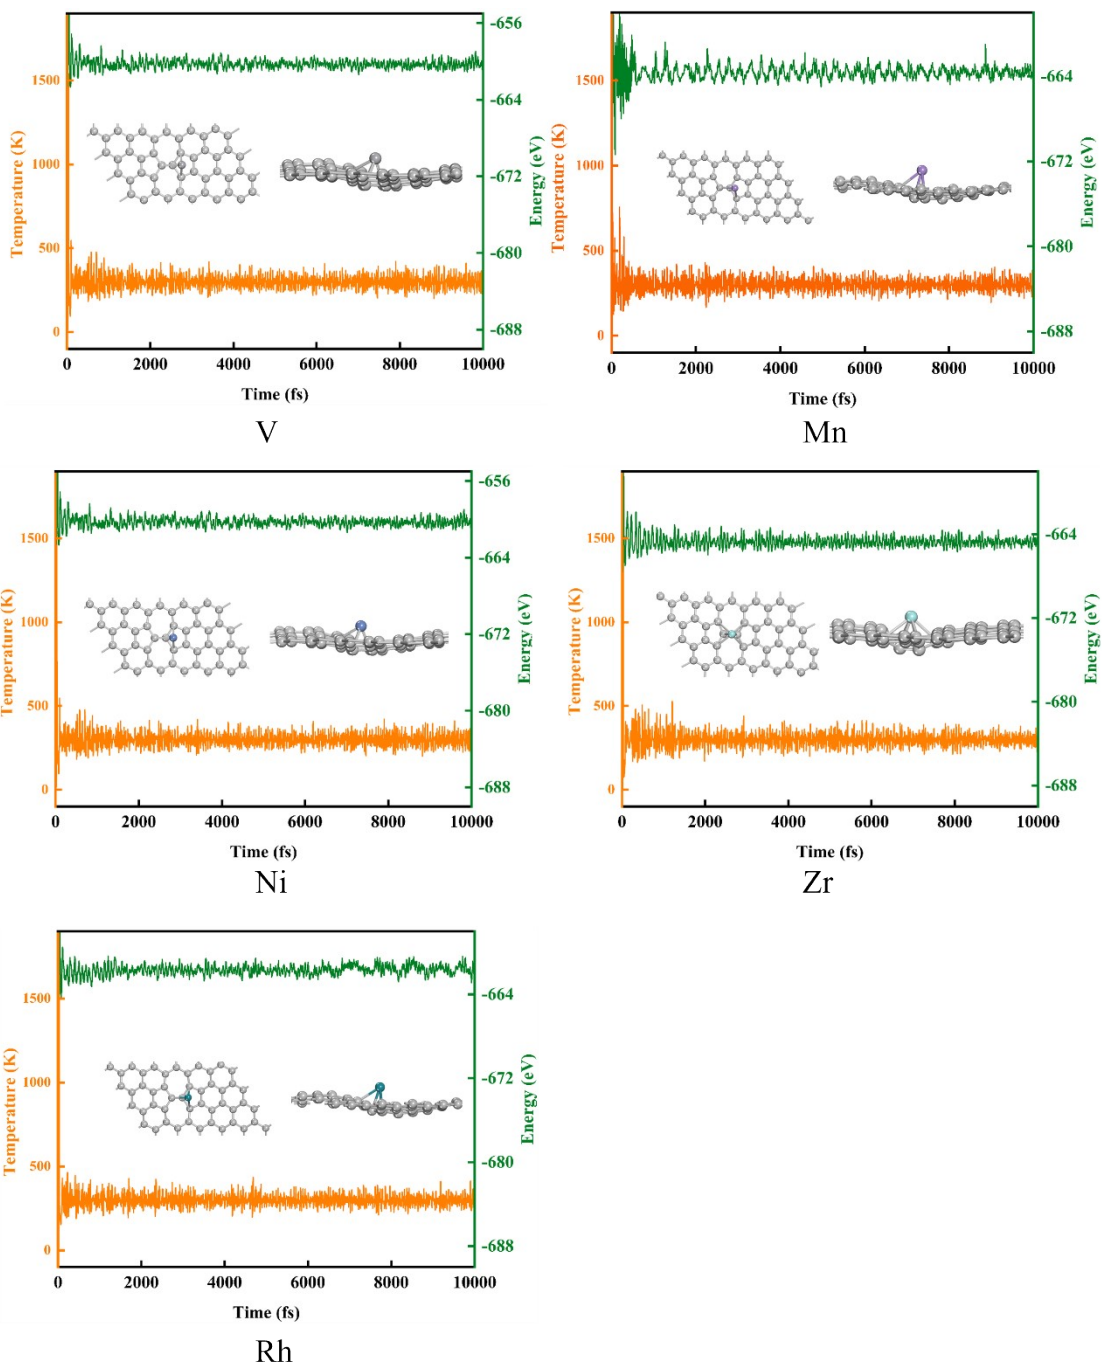

**Fig. S6.** Energy and temperature evolution versus the AIMD time for TM@SW-G.
